# Supplementary material
Source: PubMed Central journal article supplement (PMC536038)

**A.**

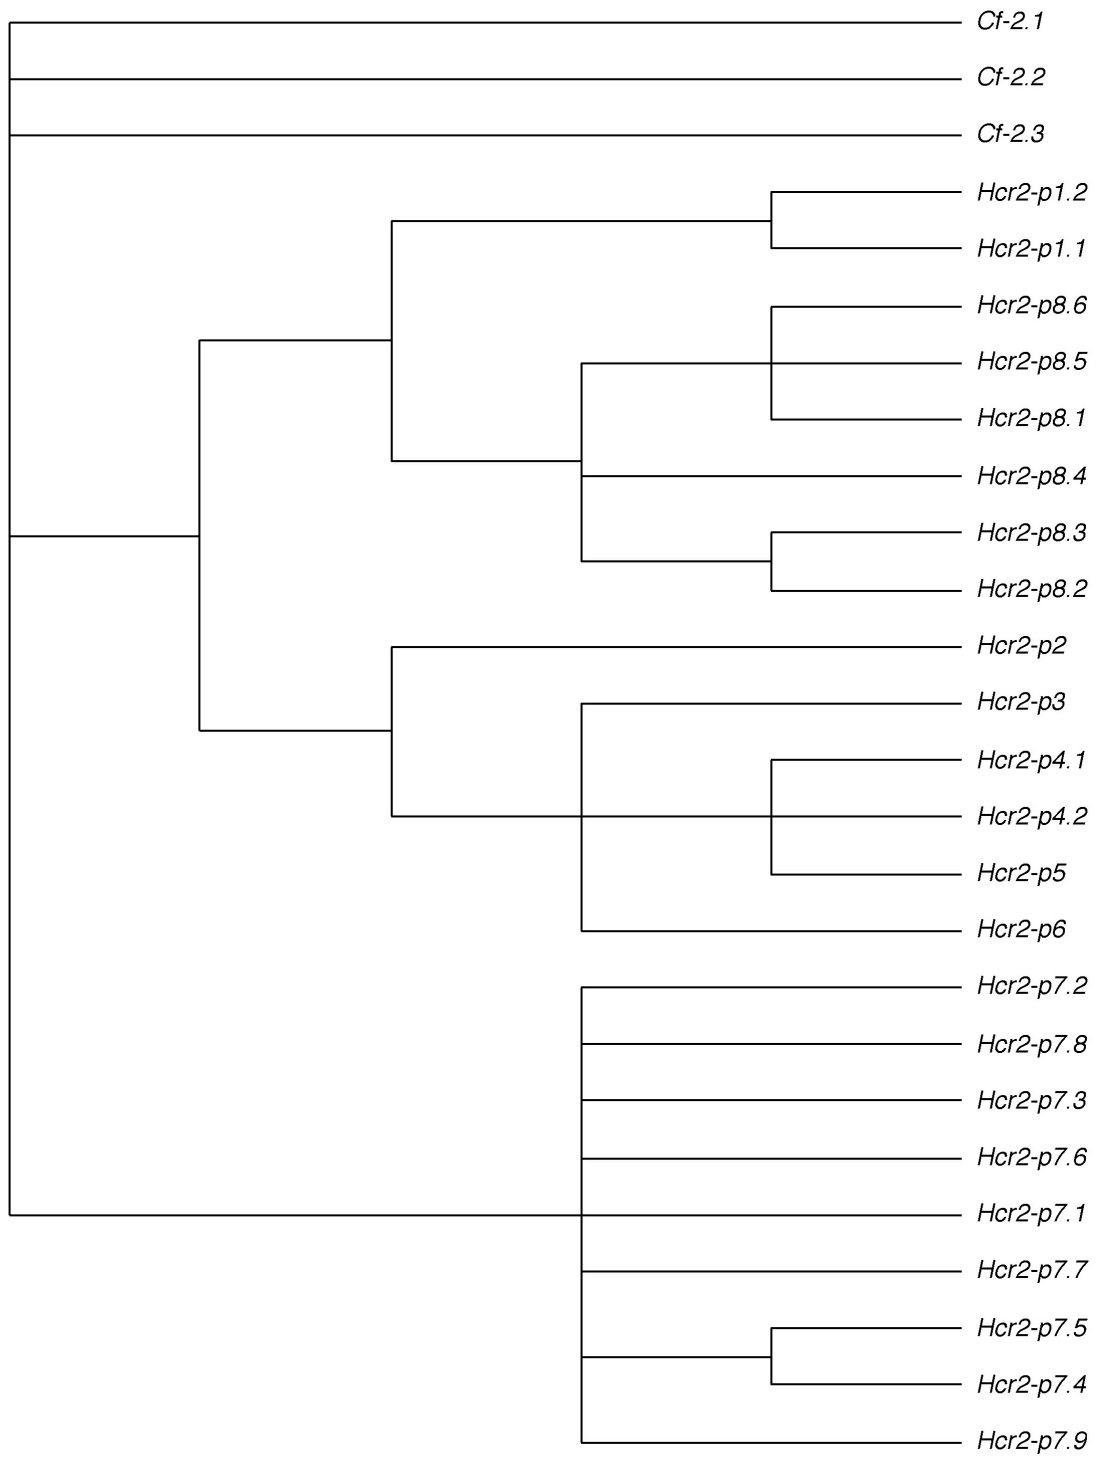

**B.**

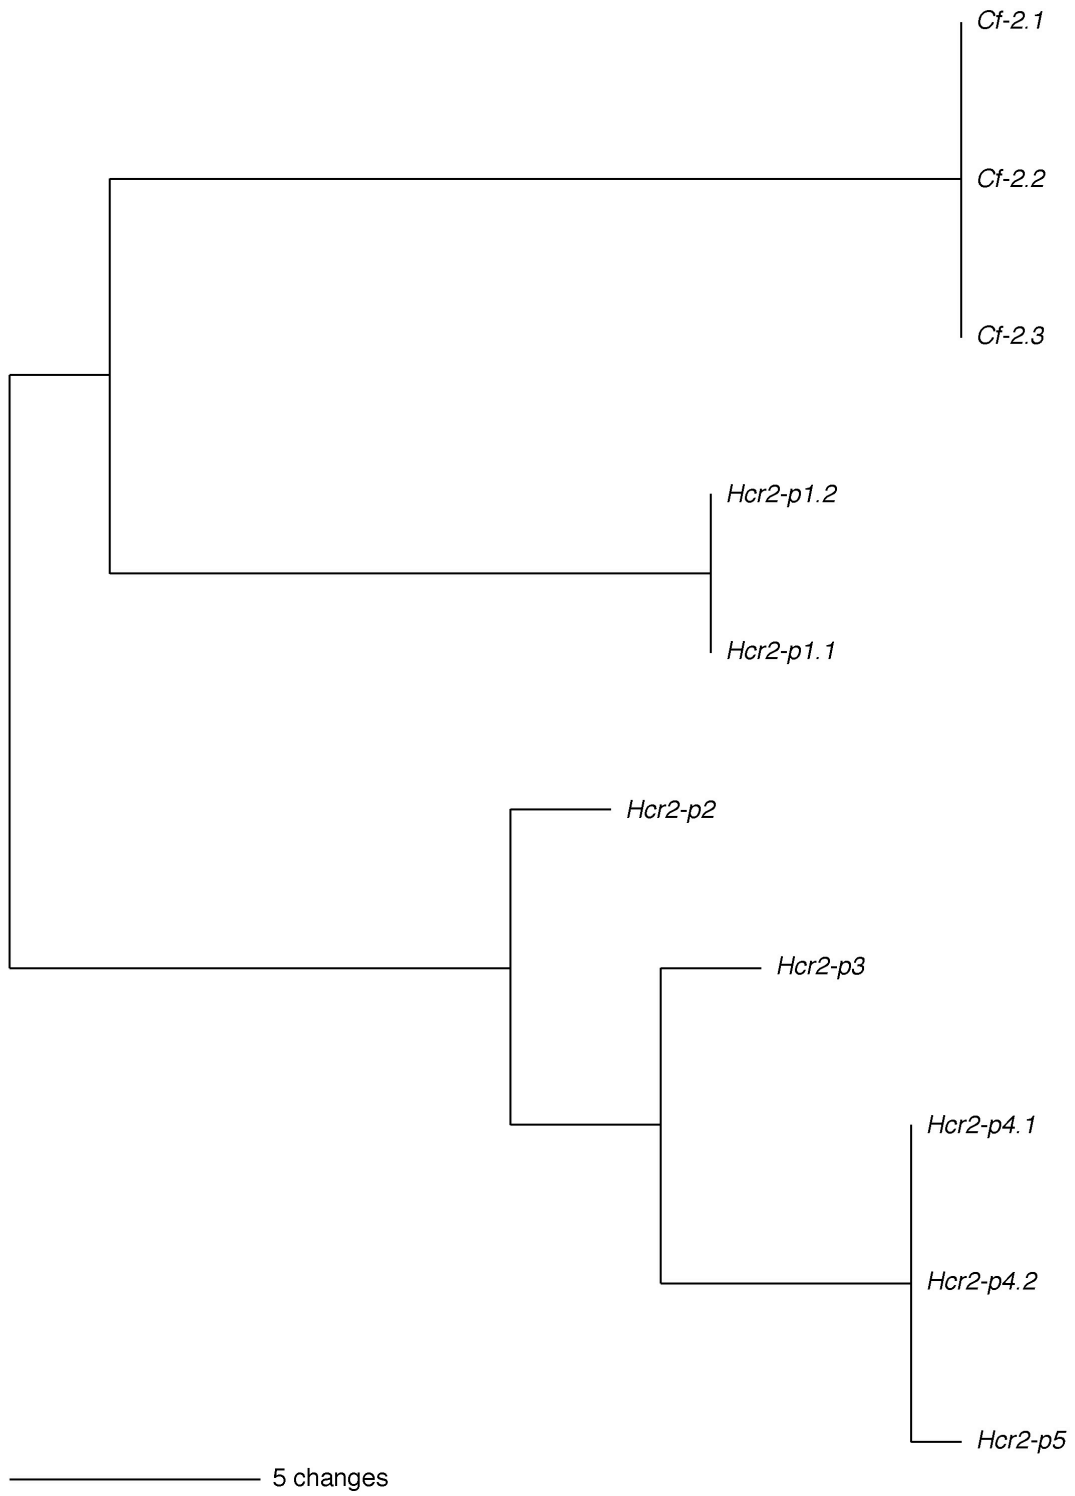

C.

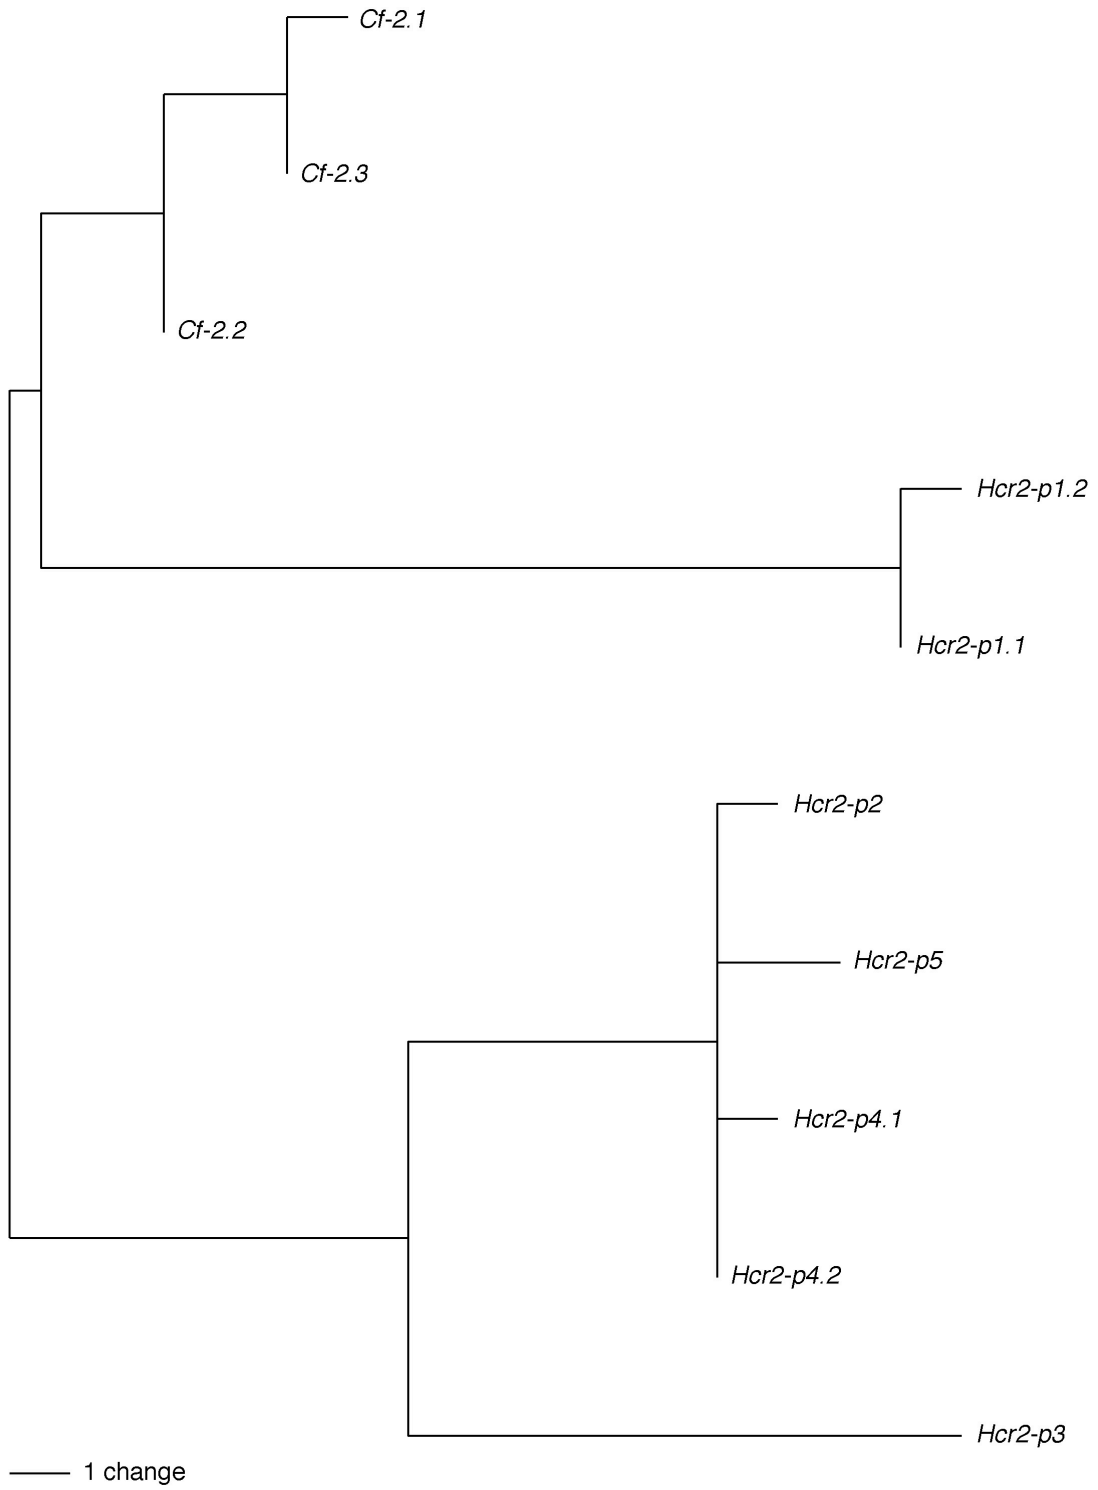

D.

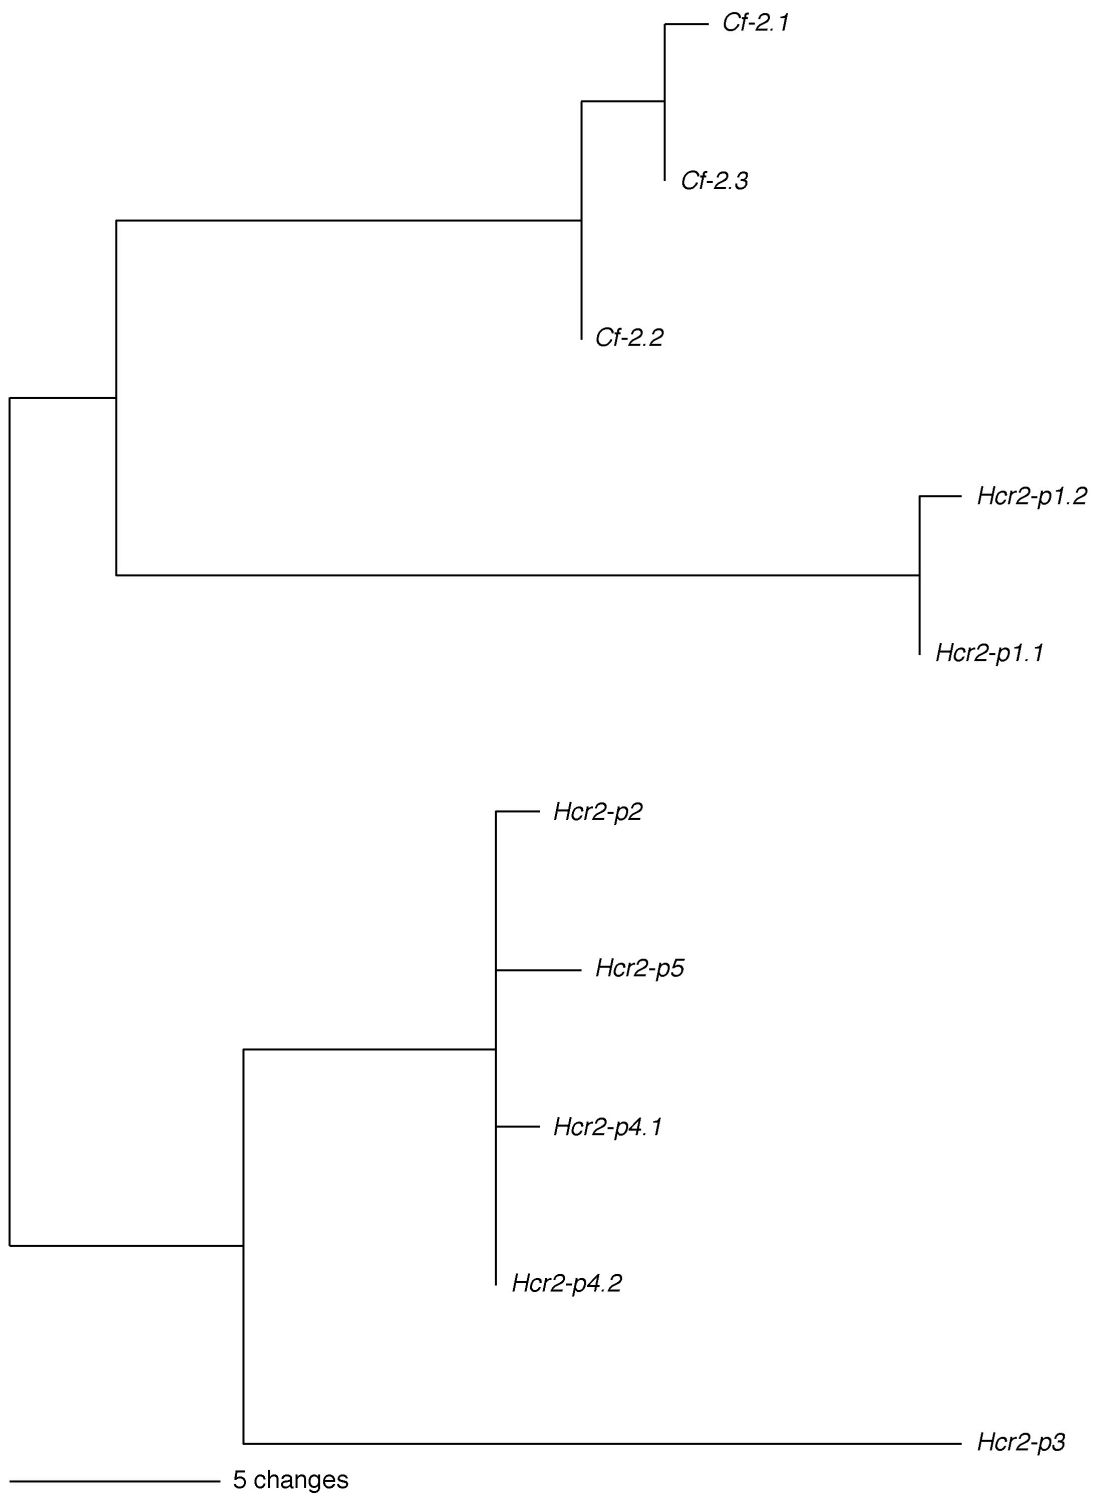

**E.**

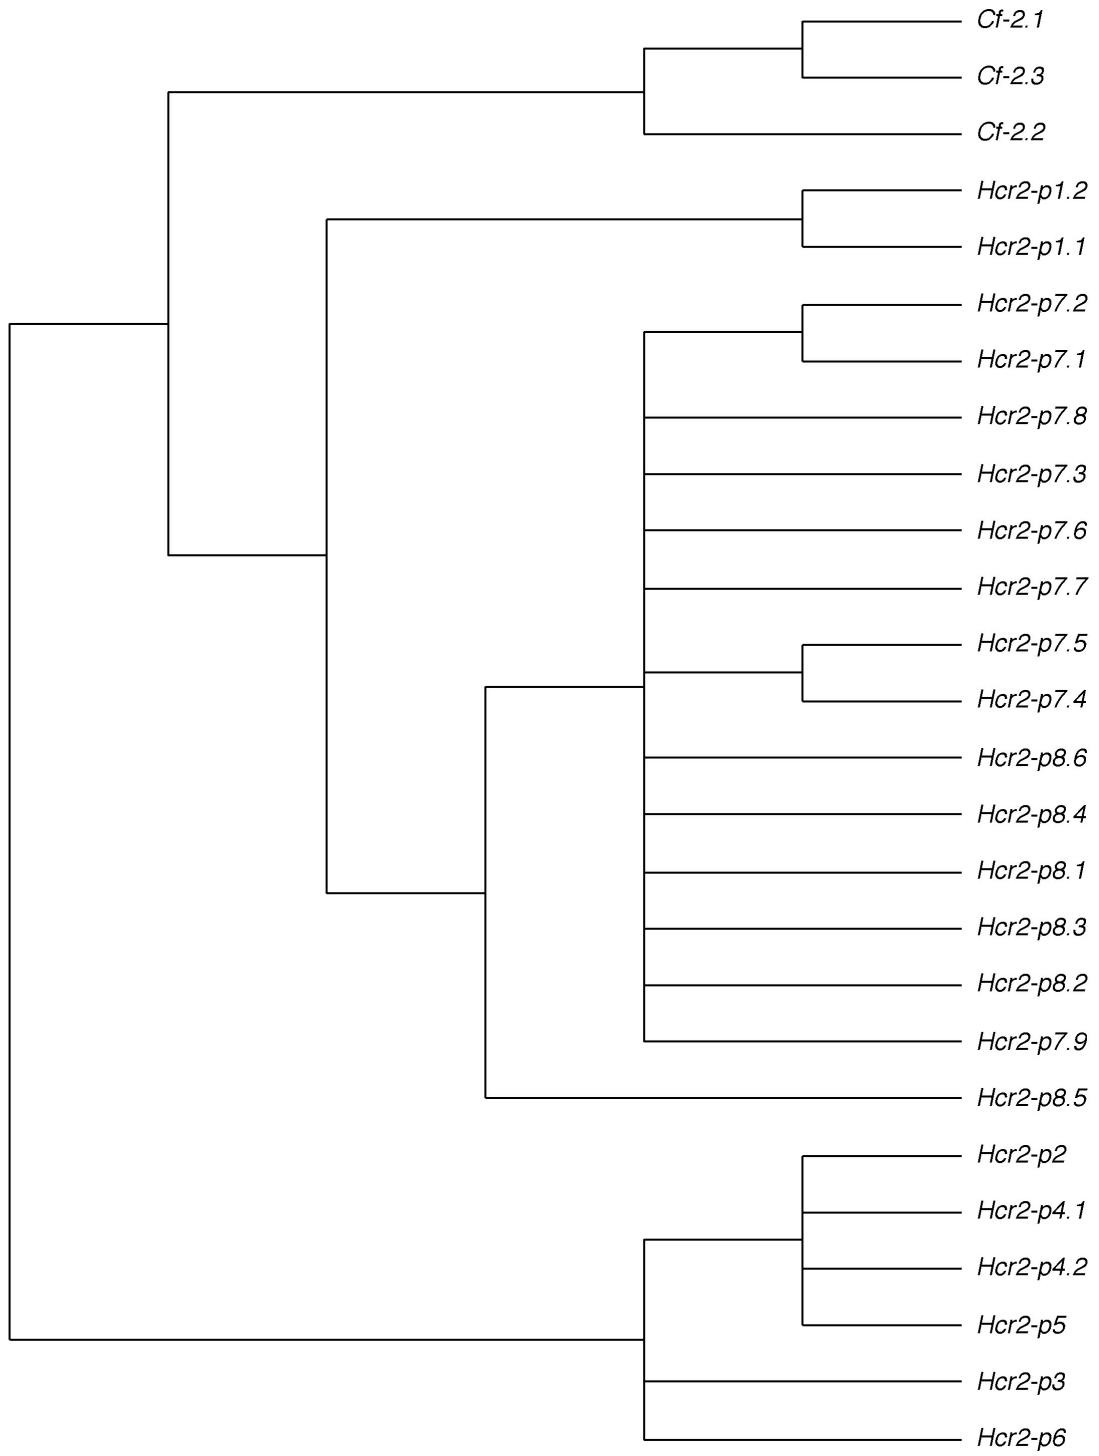

Supplement: pnas_101_50_17444__3.pdf [file pnas_101_50_17444__3.pdf]
